# Supplementary material for: Calcium, Actomyosin Kinetics, Myosin Binding Protein-C and Hypertrophic Cardiomyopathy
Source: Preprints.org preprint supplement (doi:10.20944/preprints201910.0067.v1), 2019-10-07
Supplement: Supplementary file 1 [file supplementary]

Two files submitted, put in this order

**1Calcium, Actomyosin Kinetics, Myosin Binding Protein-C and Hypertrophic Cardiomyopathy**

2 **The mechanisms of the Frank-Starling law and familial cardiomyopathy**

**are different. The function of myosin binding protein-C is retained on**

**myocyte length increase and force generated is kinase controlled.**

**Reference 3 in second should be the first submitted paper**
